# Supplementary material
Source: PubMed Central journal article supplement (PMC4977112)
Supplement: supp_WNL.0000000000002887_e-tables.pdf [file supp_WNL.0000000000002887_e-tables.pdf]

Table e-1. Comparison of three subsets of the study cohort

| Characteristic                              | Invited for the fall 2014 update survey<br>(N=12492)        |                                                            |                                                     | P-value  |
|---------------------------------------------|-------------------------------------------------------------|------------------------------------------------------------|-----------------------------------------------------|----------|
|                                             | Respondents<br>included<br>in this study<br>(n=6662, 53.3%) | Respondents<br>not included in this study<br>(n=939, 7.5%) | Non-respondents<br>to the survey<br>(n=4891, 39.2%) |          |
| Female, N (%)                               | 5138 (79.5)                                                 | 680 (75.7)                                                 | 2936 (79.3)                                         | 0.03     |
| Caucasian, N (%)                            | 6298 (94.9)                                                 | 876 (93.8)                                                 | 4142 (92.8)                                         | <0.0001  |
| Age at the time of survey, mean (SD)        | 58.7 (10.1)                                                 | 60.7 (10.1)                                                | 55.0 (12.2)                                         | <0.0001  |
| Employment (prior 6 months), N (%)          |                                                             |                                                            |                                                     | 0.001*   |
| Full-time                                   | 1471 (27.3)                                                 | 131 (20.6)                                                 | -                                                   |          |
| Part-time                                   | 678 (12.6)                                                  | 87 (13.7)                                                  | -                                                   |          |
| Not employed                                | 3242 (60.1)                                                 | 419 (65.8)                                                 | -                                                   |          |
| Income change (prior 6 months (Yes)), N (%) | 1033 (15.6)                                                 | 135 (14.7)                                                 | -                                                   | 0.36*    |
| Annual income, N (%)                        |                                                             |                                                            |                                                     | <0.0001* |
| ≤\$30,000                                   | 1384 (26.8)                                                 | 245 (36.8)                                                 | -                                                   |          |
| \$30,001 - \$100,000                        | 2658 (51.4)                                                 | 328 (49.3)                                                 | -                                                   |          |
| >\$100,000                                  | 1129 (21.8)                                                 | 93 (14.0)                                                  | -                                                   |          |
| Married (Yes), N (%)                        | 3477 (63.5)                                                 | 486 (62.5)                                                 | 2439 (62.3)                                         | 0.47     |
| Age at disease onset, mean (SD)             | 38.7 (9.7)                                                  | 38.7 (9.9)                                                 | 38.1 (10.0)                                         | 0.02     |
| Disease duration (years), mean (SD)         | 20.0 (9.8)                                                  | 22.0 (10.7)                                                | -                                                   | <0.0001* |
| Current MS course, N (%)                    |                                                             |                                                            |                                                     | <0.0001* |
| RRMS                                        | 3813 (57.2)                                                 | 429 (45.7)                                                 | -                                                   |          |
| PMS                                         | 2038 (30.6)                                                 | 334 (35.6)                                                 | -                                                   |          |
| Current PDDS, median (interquartile range)  | 3 (1, 4)                                                    | 3 (1, 5)                                                   | 3 (1, 4)                                            | <0.0001  |
| Disability benefits (Yes), N (%)            | 2587 (47.6)                                                 | 381 (57.0)                                                 | -                                                   | <0.0001* |

\*Due to missing values of non-respondents, the comparisons were made only between the respondents included in the study and those not included.

RRMS = relapsing remitting MS, PMS = progressive MS, PDDS = Patient Determined Disease Steps

Table e-2. Characteristics of various subset of the RRMS study cohort\*

| Characteristic                                                | RRMS respondents who did not take DMTs (N=741)   |                                    |           | RRMS respondents who took DMTs (N=3072) |                    |           | RRMS Respondents who obtained DMTs through insurance by type (N=2241) |                     |                          |                 |         |
|---------------------------------------------------------------|--------------------------------------------------|------------------------------------|-----------|-----------------------------------------|--------------------|-----------|-----------------------------------------------------------------------|---------------------|--------------------------|-----------------|---------|
|                                                               | Personal choice/Physician recommendation (N=673) | Insurance/Financial reasons (N=80) | p-value** | Free/discounted drug program (N=818)    | Insurance (N=2569) | p-value** | Only private (N=1277)                                                 | Only Public (N=361) | Public + Private (N=340) | Public+ (N=165) | p-value |
| Female, N (%)                                                 | 577 (85.7)                                       | 69 (86.3)                          | 0.94      | 719 (87.9)                              | 2148 (83.6)        | 0.004     | 1097 (85.9)                                                           | 279 (77.3)          | 271 (79.7)               | 137 (83.0)      | 0.0003  |
| Caucasian, N (%)                                              | 639 (95.0)                                       | 69 (86.3)                          | 0.004     | 762 (93.2)                              | 2392 (93.1)        | 0.62      | 1211 (94.8)                                                           | 324 (89.8)          | 317 (93.2)               | 149 (90.3)      | 0.0022  |
| Age at disease onset, mean (SD)                               | 39.4 (9.5)                                       | 37.6 (10.4)                        | 0.05      | 37.6 (9.5)                              | 37.8 (9.4)         | 0.82      | 37.2 (8.9)                                                            | 38.3 (9.8)          | 40.6 (10.3)              | 42.4 (10.3)     | <0.0001 |
| Age at the time of survey, mean (SD)                          | 59.3 (9.6)                                       | 56.4 (8.8)                         | 0.02      | 53.8 (10.0)                             | 55.1 (9.7)         | 0.11      | 52.6 (8.5)                                                            | 56.1 (10.4)         | 60.3 (8.4)               | 63.3 (8.8)      | <0.0001 |
| Employment in the prior 6 months, N (%)                       |                                                  |                                    |           |                                         |                    |           |                                                                       |                     |                          |                 |         |
| Full-time                                                     | 160 (30.4)                                       | 21 (32.3)                          |           | 263 (38.2)                              | 879 (40.5)         |           | 662 (58.8)                                                            | 20 (6.8)            | 20 (7.8)                 | 5 (3.8)         |         |
| Part-time                                                     | 74 (14.1)                                        | 15 (23.1)                          | 0.25      | 103 (15.0)                              | 324 (14.9)         | 0.005     | 171 (15.2)                                                            | 51 (17.2)           | 30 (11.8)                | 22 (16.8)       | <0.0001 |
| Not employed                                                  | 292 (55.5)                                       | 29 (44.6)                          |           | 323 (46.9)                              | 969 (44.6)         |           | 292 (26.0)                                                            | 225 (76.0)          | 205 (80.4)               | 104 (79.4)      |         |
| Income change in the prior 6 months (Yes), N (%)              | 103 (16.4)                                       | 25 (33.8)                          | 0.001     | 144 (18.8)                              | 467 (19.2)         | 0.39      | 266 (21.9)                                                            | 49 (14.5)           | 48 (14.8)                | 27 (17.2)       | 0.002   |
| Negative insurance change in the prior 12 months (Yes), N (%) | 165 (24.5)                                       | 44 (55.0)                          | <0.0001   | 244 (29.8)                              | 564 (22.0)         | <0.0001   | 293 (22.9)                                                            | 55 (15.2)           | 69 (20.3)                | 24 (14.6)       | 0.002   |
| Annual income, N (%)                                          |                                                  |                                    |           |                                         |                    |           |                                                                       |                     |                          |                 |         |
| ≤\$30,000                                                     | 138 (26.5)                                       | 29 (45.3)                          | 0.0008    | 176 (26.9)                              | 397 (19.6)         | <0.0001   | 63 (6.3)                                                              | 163 (56.8)          | 62 (23.1)                | 41 (30.6)       | <0.0001 |
| \$30,001 - \$100,000                                          | 264 (50.8)                                       | 32 (50.0)                          |           | 367 (56.0)                              | 991 (49.0)         |           | 481 (48.3)                                                            | 105 (36.6)          | 158 (58.7)               | 65 (48.5)       |         |
| >\$100,000                                                    | 118 (22.7)                                       | 3 (4.7)                            |           | 112 (17.1)                              | 634 (31.4)         |           | 452 (45.4)                                                            | 19 (6.6)            | 49 (18.2)                | 28 (20.9)       |         |
| Married (yes), N (%)                                          | 446 (67.0)                                       | 37 (46.3)                          | 0.0008    | 520 (64.0)                              | 1755 (68.8)        | 0.009     | 939 (74.1)                                                            | 178 (49.7)          | 247 (73.5)               | 106 (64.2)      |         |
| Disease duration (years), mean (SD)                           | 19.9 (8.9)                                       | 18.7 (9.1)                         | 0.64      | 15.8 (8.1)                              | 17.0 (8.7)         | 0.08      | 15.7 (7.6)                                                            | 18.2 (9.9)          | 20.4 (9.6)               | 21.0 (9.8)      | <0.0001 |
| Current PDDS, median (interquartile)                          | 2 (1, 4)                                         | 3 (1, 4)                           | 0.009     | 2 (1, 4)                                | 2 (1, 4)           | 0.2       | 1 (0, 3)                                                              | 3 (2, 5)            | 3 (2, 4)                 | 4 (1, 5)        | <0.0001 |
| Disability benefits (yes), N (%)                              | 199 (37.0)                                       | 30 (44.8)                          | 0.13      | 281 (41.0)                              | 781 (36.7)         | 0.0002    | 152 (14.2)                                                            | 224 (75.4)          | 194 (73.2)               | 90 (62.9)       | <0.0001 |

\* Subsets of the RRMS study cohort were categorized by reasons not taking disease-modifying therapies (DMTs), resources to pay for DMTs, and types of insurances

\*\*When calculating p values, the overlapping in the two groups was excluded to avoid the underestimate of the difference between the two groups as well as the variance of the two groups.

RRMS = relapsing remitting MS, PMS = progressive MS, PDDS = Patient Determined Disease Steps
