# Supplementary material
Source: PubMed Central journal article supplement (PMC4977112)
Supplement: supp_WNL.0000000000002887_Supplemental_Figure_e-1.pdf [file supp_WNL.0000000000002887_Supplemental_Figure_e-1.pdf]

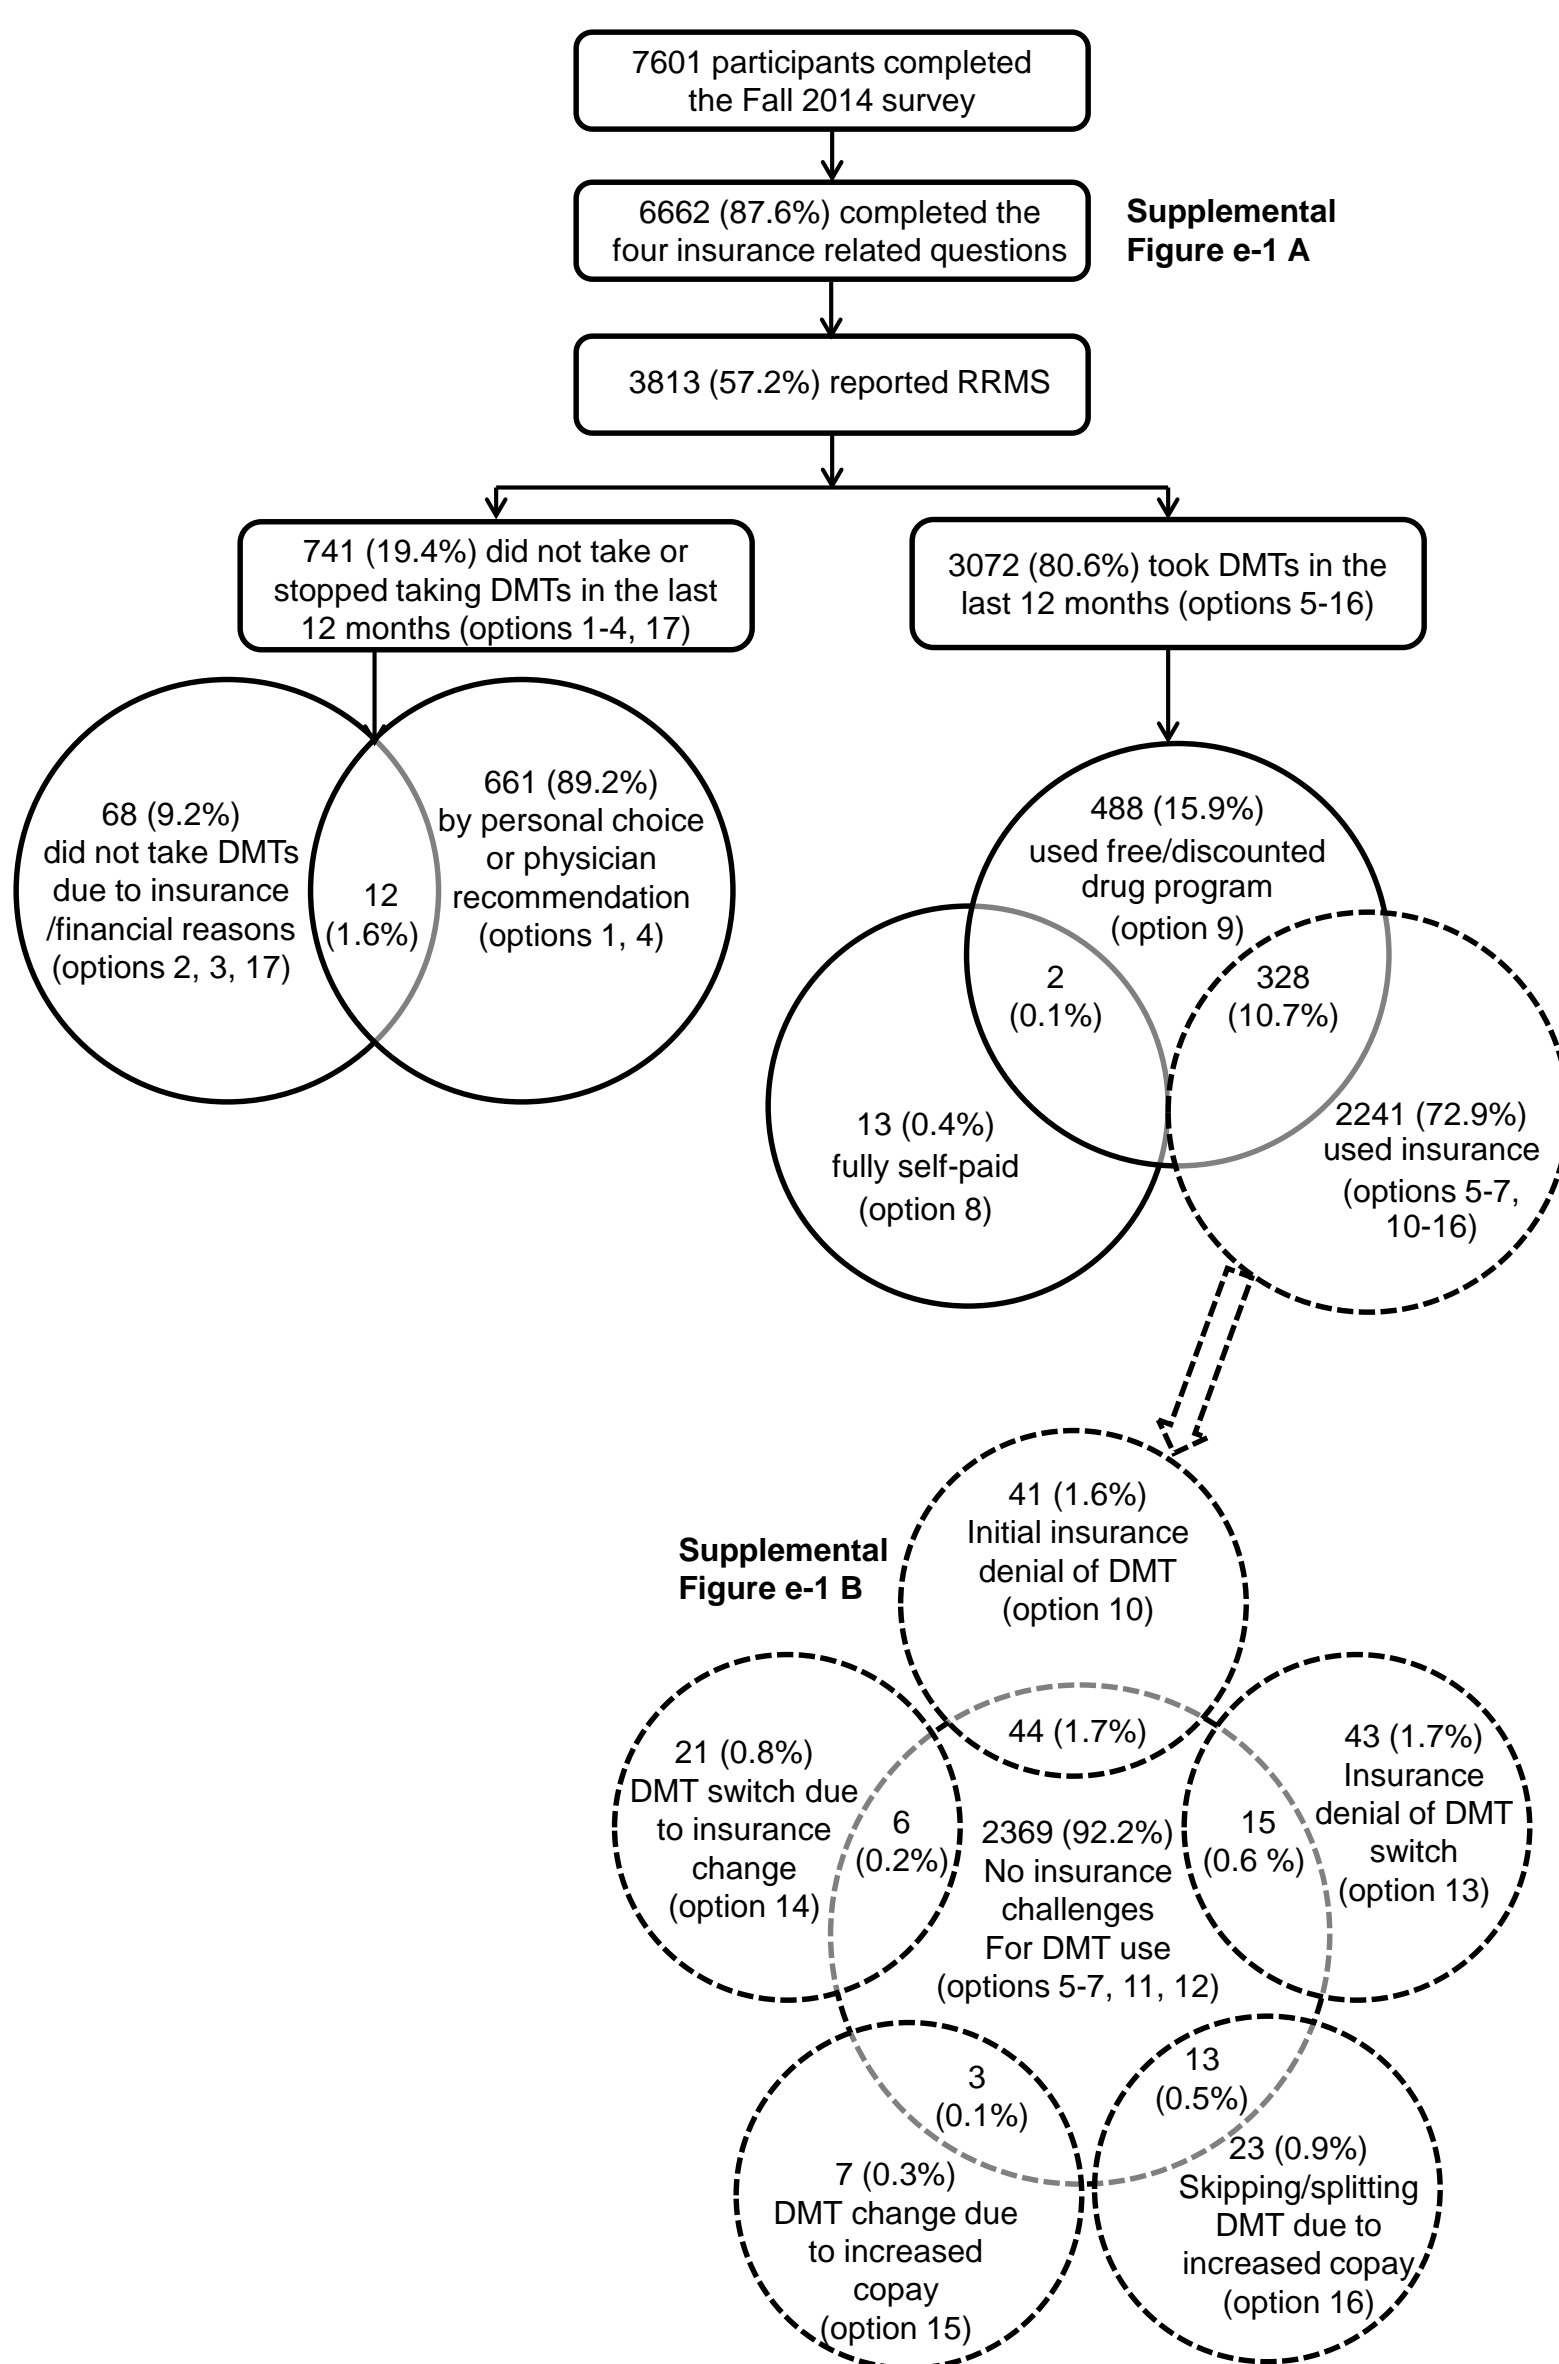

**Figure e-1: Disposition of Respondents by DMT Use and Insurance Challenges within RRMS Subset.\***

(A) Cohort disposition for the RRMS subset (B) Distribution of RRMS respondents who took DMTs by experienced insurance challenges.

RRMS = relapsing remitting MS, DMT = disease-modifying therapy

\*Total of the respondents (%) in (B) is greater than 100% due to overlap in the different types of challenges.
